# Supplementary material for: Morocco’s First Biobank: Establishment, Ethical Issues, Biomedical Research Opportunities, and Challenges
Source: Hindawi journal article supplement (doi:10.1155/2020/8812609), 2020-01-01
Supplement: f1 [file 8812609.f1.pdf]

**Table S1** : Quality assessment of DNA samples of the BRO Biobank using NanoDrop spectrophotometry

|                                                      | <b>DNA samples</b> | <b>Concentration (ng/μl)</b> | <b>OD<sub>260</sub>/OD<sub>280</sub></b> |
|------------------------------------------------------|--------------------|------------------------------|------------------------------------------|
| <b>Quality assessment after 2 years of storage</b>   | <b>E1</b>          | 60.8                         | 1.9                                      |
|                                                      | <b>E2</b>          | 213.1                        | 1.9                                      |
|                                                      | <b>E3</b>          | 290.4                        | 1.9                                      |
|                                                      | <b>E4</b>          | 183.7                        | 1.9                                      |
|                                                      | <b>E5</b>          | 275.2                        | 1.9                                      |
|                                                      | <b>E6</b>          | 243.9                        | 2.1                                      |
|                                                      | <b>E7</b>          | 347.3                        | 2.0                                      |
|                                                      | <b>E8</b>          | 163.1                        | 1.9                                      |
|                                                      | <b>E9</b>          | 247.8                        | 2.0                                      |
|                                                      | <b>E10</b>         | 84.3                         | 1.9                                      |
| <b>Quality assessment after 2.5 years of storage</b> | <b>E11</b>         | 144.5                        | 1.9                                      |
|                                                      | <b>E12</b>         | 125.4                        | 2.0                                      |
|                                                      | <b>E13</b>         | 150.2                        | 2.0                                      |
|                                                      | <b>E14</b>         | 178.2                        | 2.0                                      |
|                                                      | <b>E15</b>         | 225.3                        | 2.0                                      |
|                                                      | <b>E16</b>         | 240.2                        | 2.0                                      |
|                                                      | <b>E17</b>         | 228.5                        | 1.9                                      |

|  |            |       |     |
|--|------------|-------|-----|
|  | <b>E18</b> | 155.6 | 1.9 |
|  | <b>E19</b> | 134.1 | 1.9 |
|  | <b>E20</b> | 151.3 | 1.9 |
|  | <b>E21</b> | 187.8 | 1.9 |
|  | <b>E22</b> | 313.3 | 1.9 |
|  | <b>E23</b> | 145.8 | 1.9 |
|  | <b>E24</b> | 51.0  | 2.0 |
|  | <b>E25</b> | 318.7 | 2.0 |

**Table S2** : Quality assessment of RNA samples of the BRO Biobank using NanoDrop spectrophotometry

|                                                      | <b>RNA samples</b> | <b>Concentration (ng/μl)</b> | <b>OD<sub>260</sub>/OD<sub>280</sub></b> |
|------------------------------------------------------|--------------------|------------------------------|------------------------------------------|
| <b>Quality assessment after 2 years of storage</b>   | <b>E1</b>          | 246.9                        | 1.8                                      |
|                                                      | <b>E2</b>          | 266.0                        | 1.8                                      |
|                                                      | <b>E3</b>          | 261.4                        | 1.8                                      |
| <b>Quality assessment after 2.5 years of storage</b> | <b>E4</b>          | 182.9                        | 1.8                                      |
|                                                      | <b>E5</b>          | 149.9                        | 1.8                                      |
|                                                      | <b>E6</b>          | 186.6                        | 1.7                                      |
|                                                      | <b>E7</b>          | 239.3                        | 1.8                                      |
